# Supplementary material for: REL-1017 (esmethadone; d-methadone) does not cause reinforcing effect, physical dependence and withdrawal signs in Sprague Dawley rats
Source: PubMed Central journal article supplement (PMC9259683; doi:10.1038/s41598-022-15055-3), 2022-07-06
Supplement: 41598_2022_15055_MOESM2_ESM.pdf [file 41598_2022_15055_MOESM2_ESM.pdf]

## Study 1

### Normal QQ plot

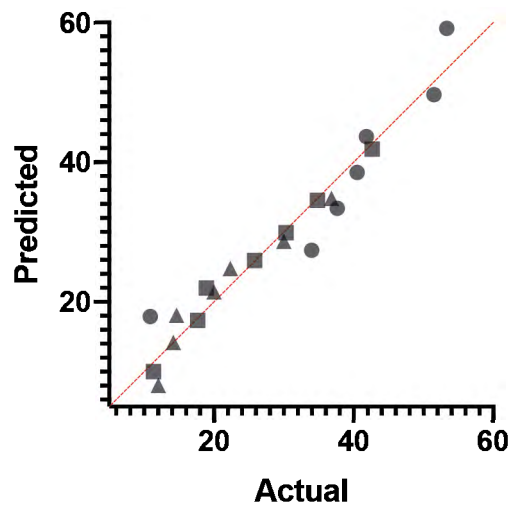

- DAY1
- DAY2
- ▲ DAY3

Passed normality test (alpha=0.05)? YES

## Study 2

### Normal QQ plot

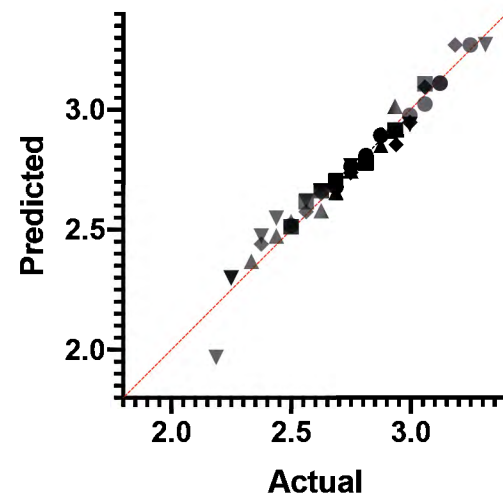

- 0 mg/kg/day (Vehicle)
- 100 mg/kg/day REL-1017
- ▲ 62.5 mg/kg/day REL-1017
- ▼ Morphine
- ◆ 200 mg/kg/day Ketamine

Passed normality test (alpha=0.05)? YES
