# Supplementary material for: REL-1017 (esmethadone; d-methadone) does not cause reinforcing effect, physical dependence and withdrawal signs in Sprague Dawley rats
Source: PubMed Central journal article supplement (PMC9259683; doi:10.1038/s41598-022-15055-3), 2022-07-06

**Figure S2: Increasing doses of REL-1017 (esmethadone) did not engender decreases in cumulative number of lever presses**

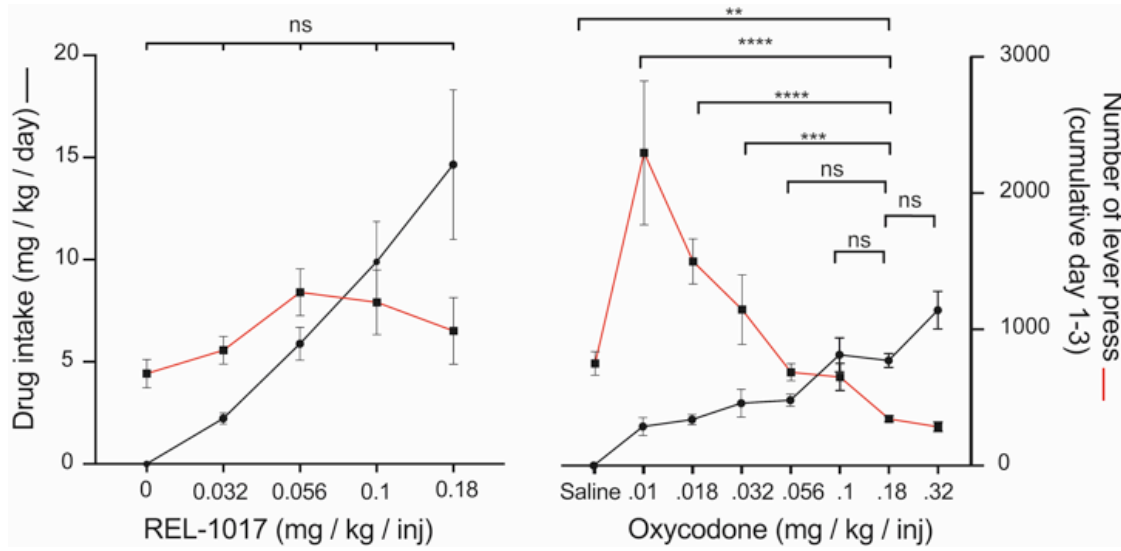

Supplement: 41598_2022_15055_MOESM3_ESM.pdf [file 41598_2022_15055_MOESM3_ESM.pdf]
