# Supplementary material for: REL-1017 (esmethadone; d-methadone) does not cause reinforcing effect, physical dependence and withdrawal signs in Sprague Dawley rats
Source: PubMed Central journal article supplement (PMC9259683; doi:10.1038/s41598-022-15055-3), 2022-07-06

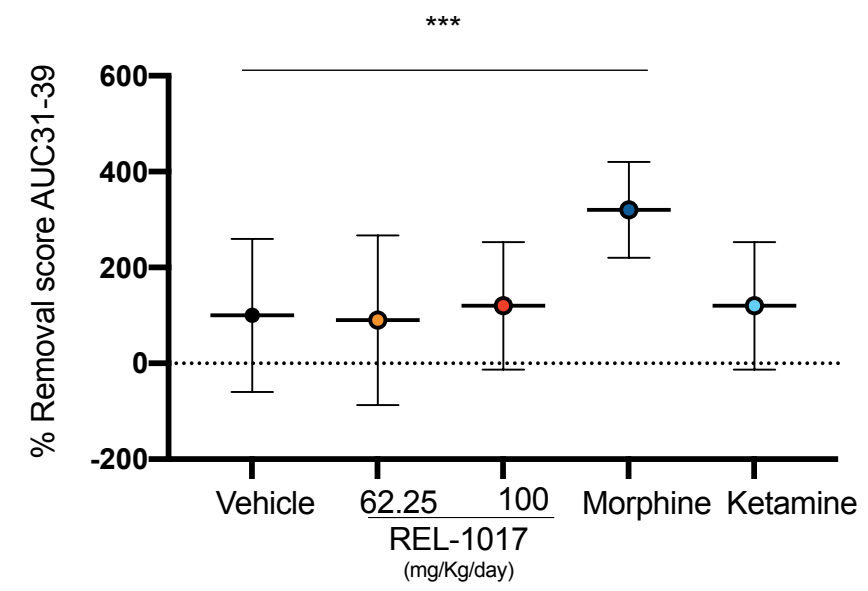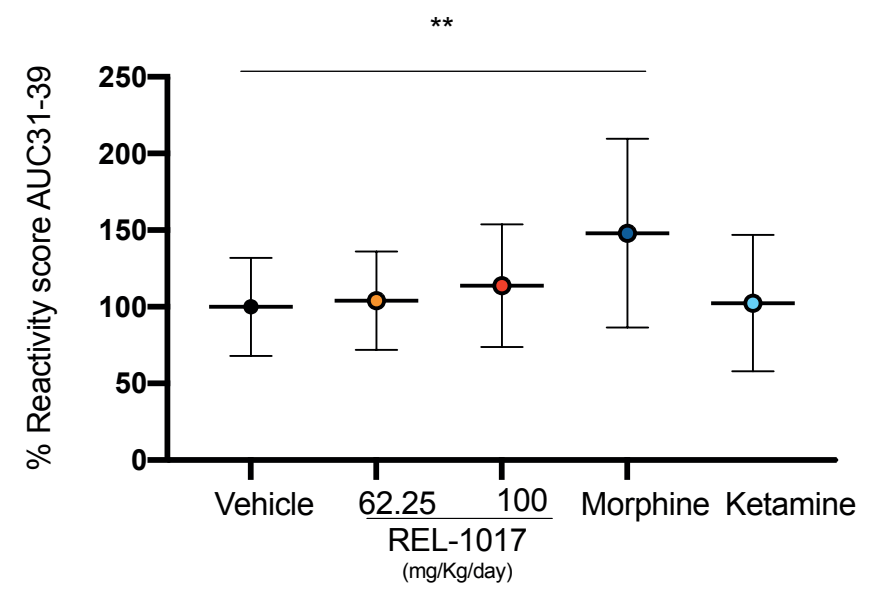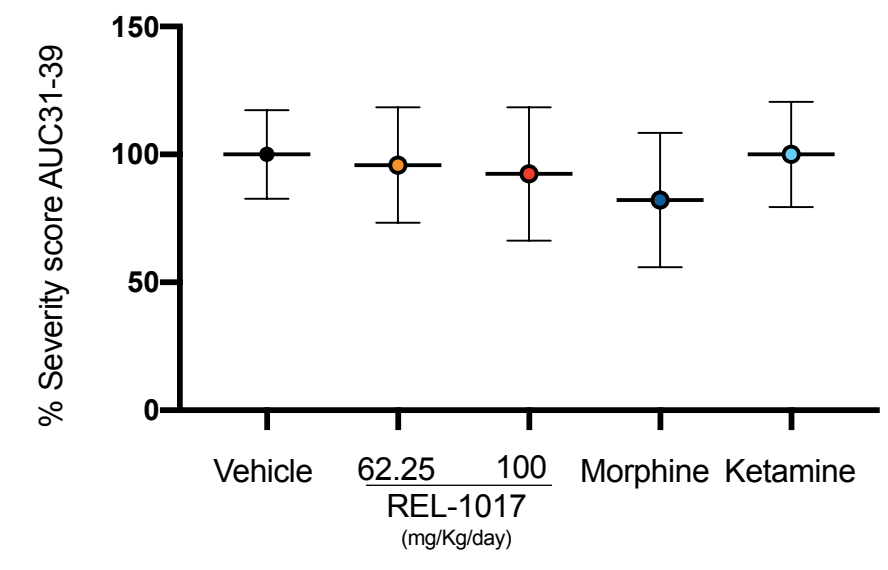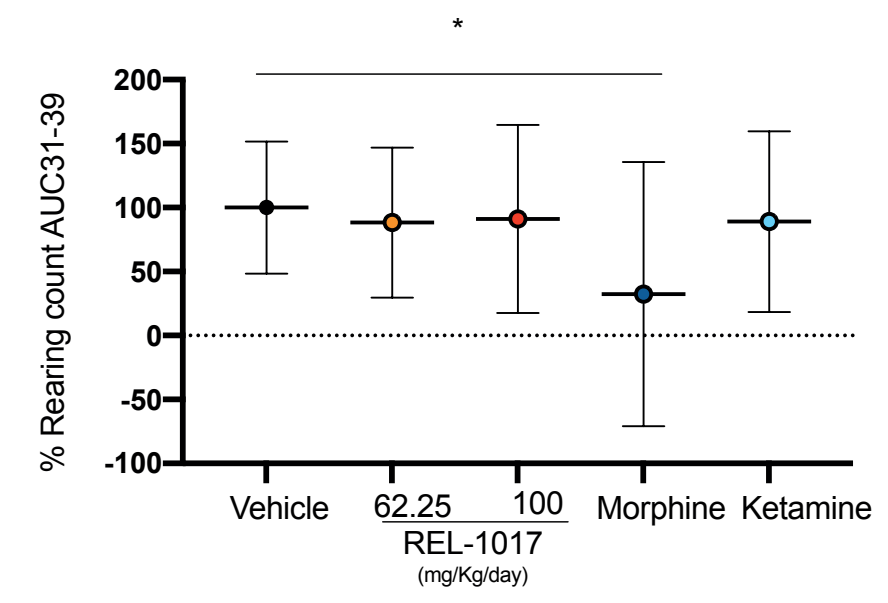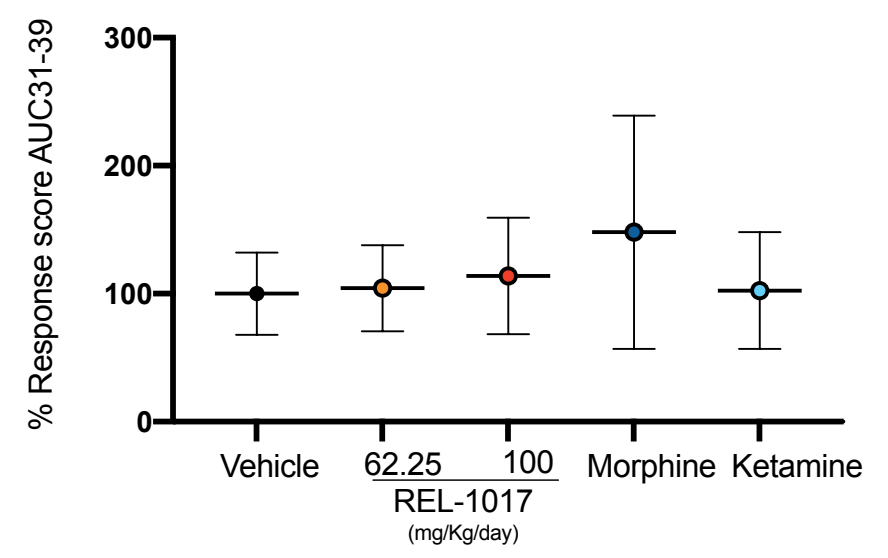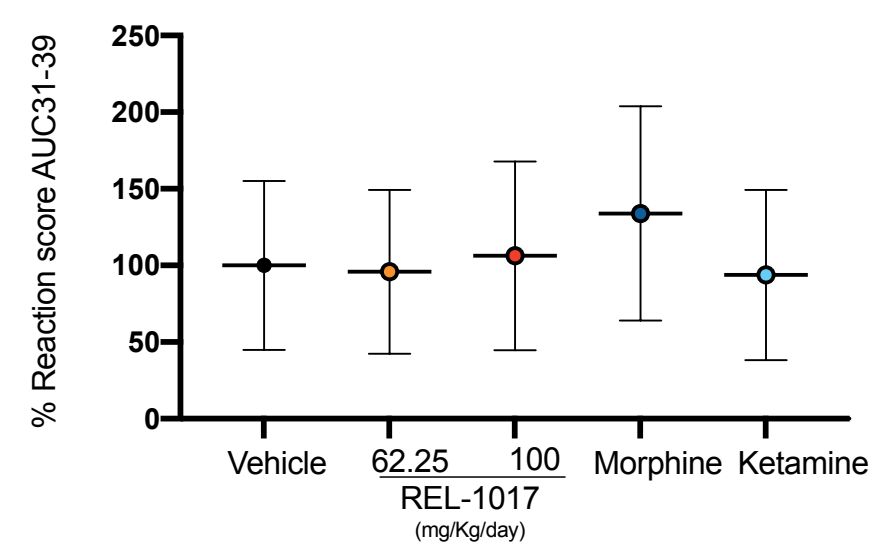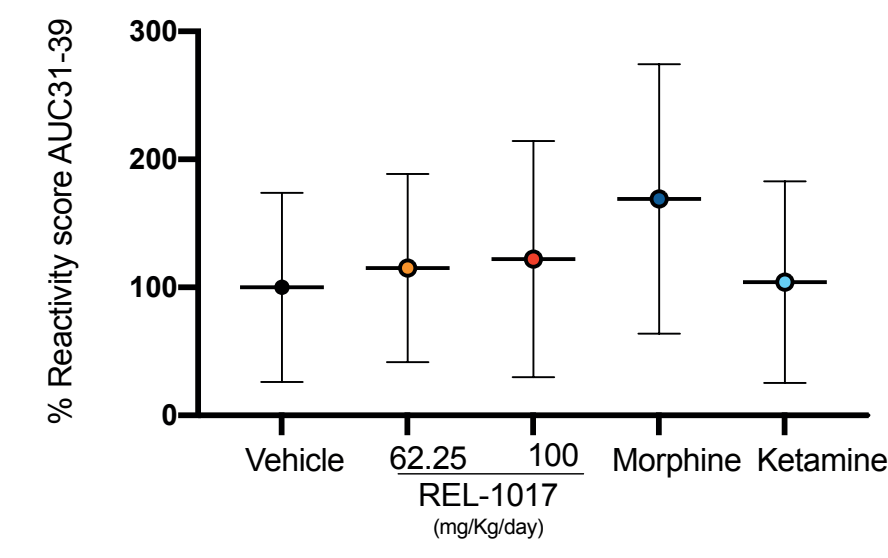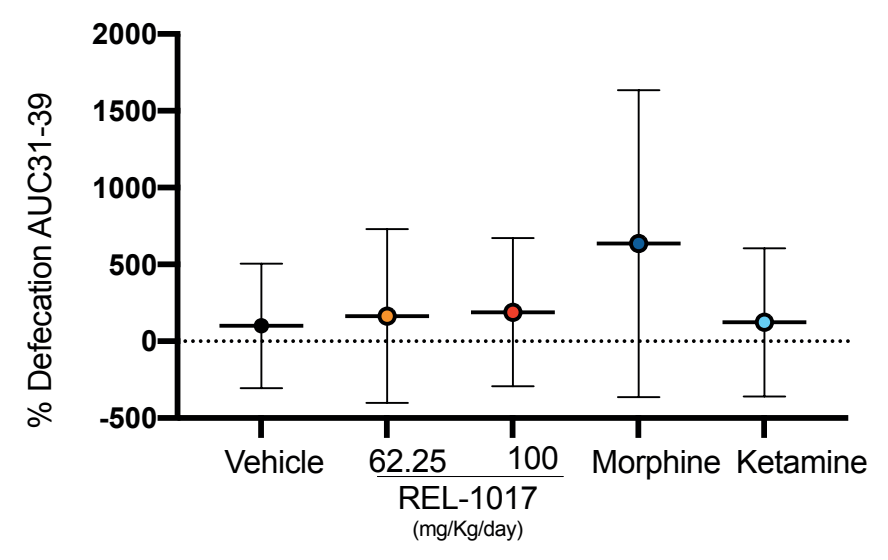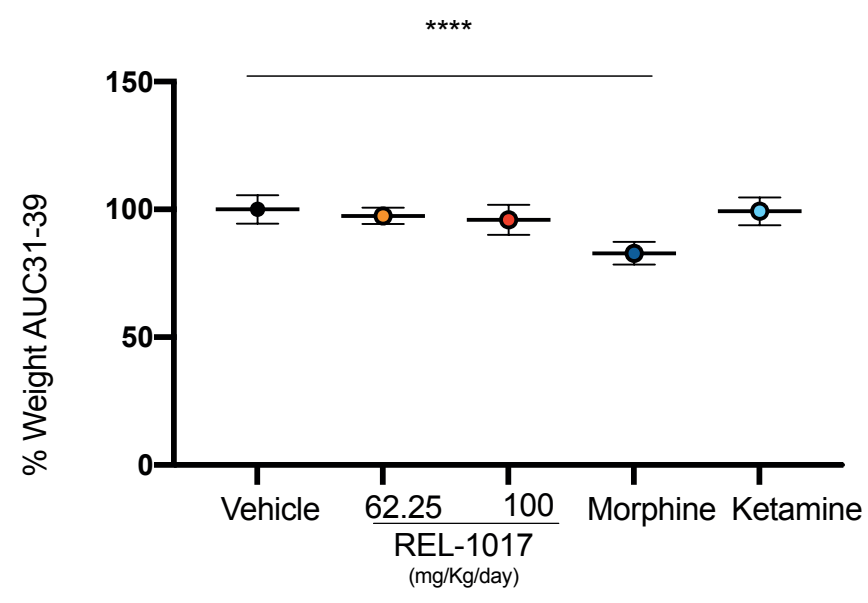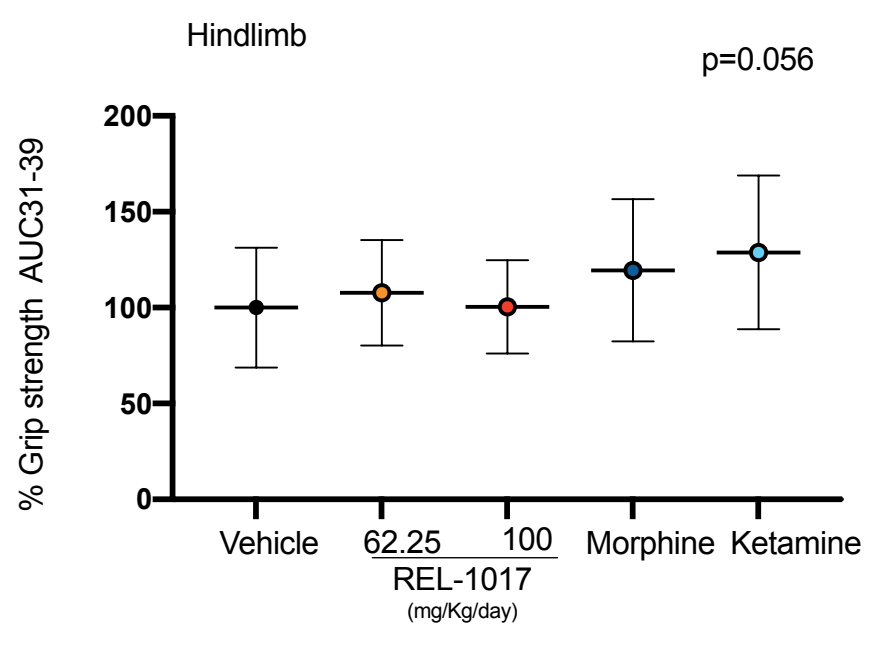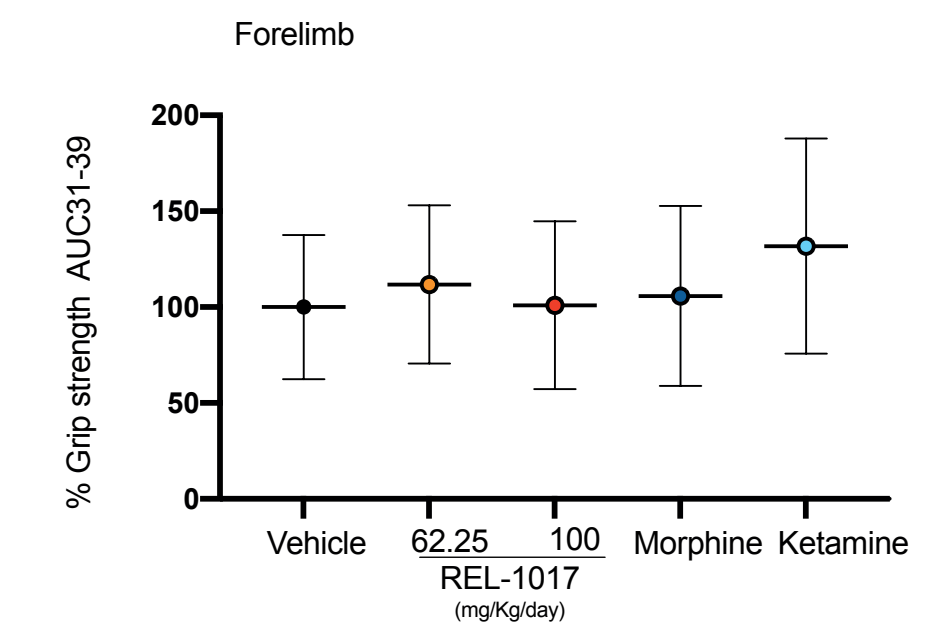

Supplement: 41598_2022_15055_MOESM4_ESM.pdf [file 41598_2022_15055_MOESM4_ESM.pdf]
